# Supplementary material for: SLUG‐related partial epithelial‐to‐mesenchymal transition is a transcriptomic prognosticator of head and neck cancer survival
Source: PubMed Central journal article supplement (PMC8763659; doi:10.1002/1878-0261.13075), 2021-08-21

## A TCGA

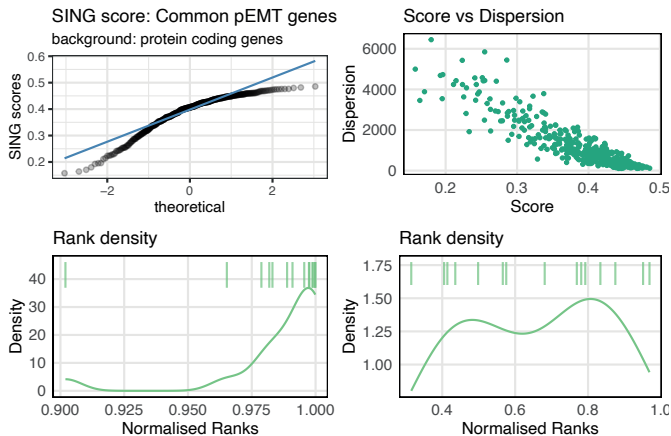

## B MDACC

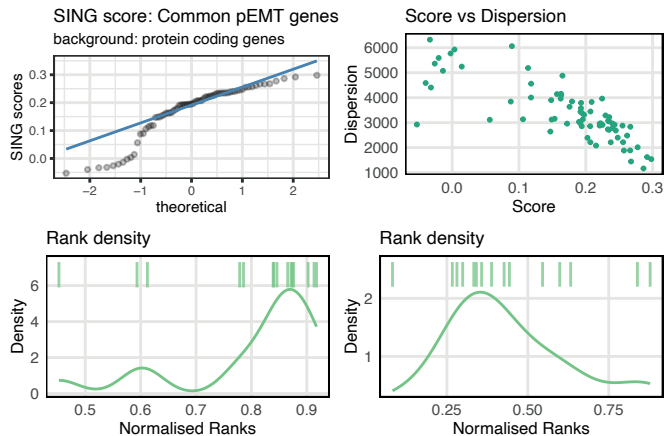

## C FHCRC

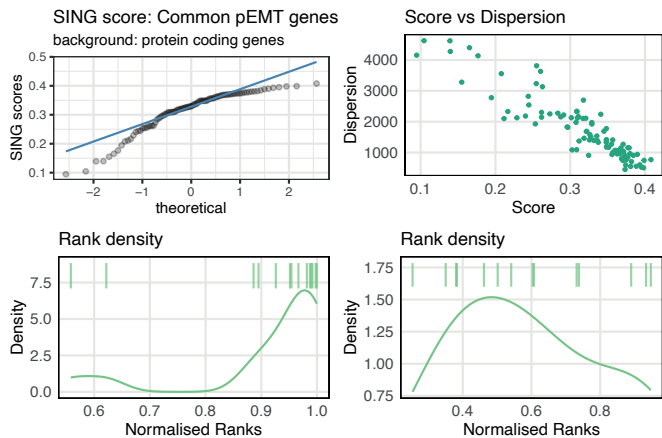

## D TCGA

### RT patients (n = 133)

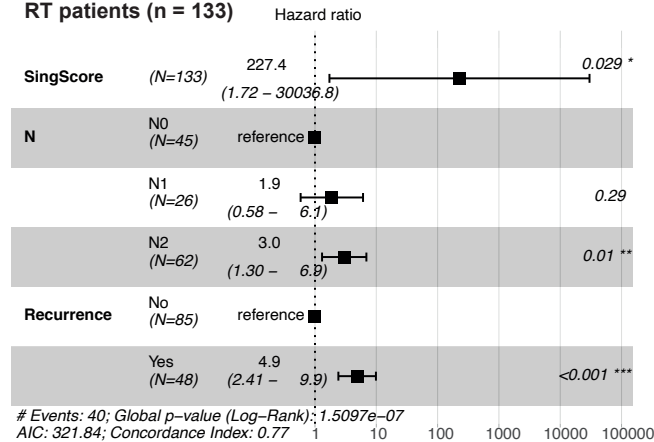

Supplement: MOL2-16-347-s010.pdf [file MOL2-16-347-s010.pdf]
