# Supplementary material for: SLUG‐related partial epithelial‐to‐mesenchymal transition is a transcriptomic prognosticator of head and neck cancer survival
Source: PubMed Central journal article supplement (PMC8763659; doi:10.1002/1878-0261.13075), 2021-08-21

**A**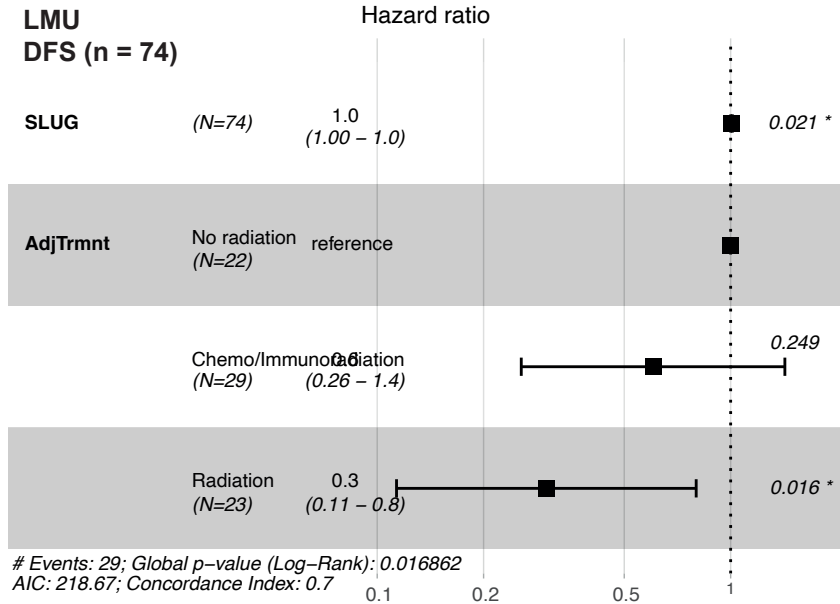**B**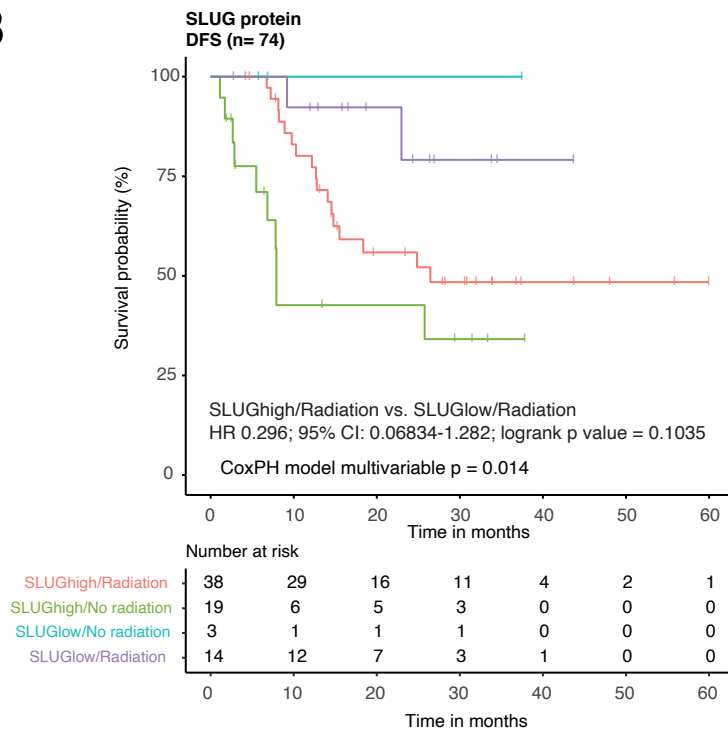**C**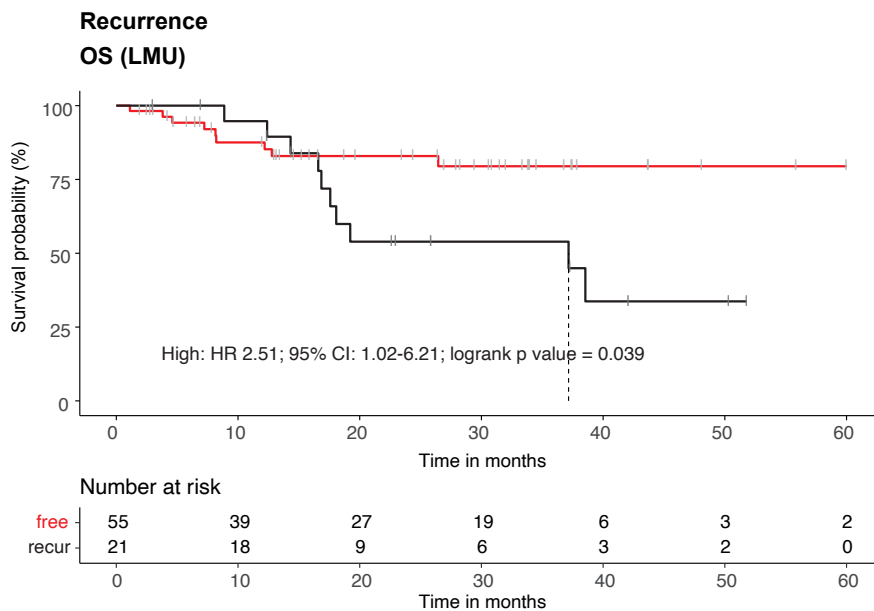

Supplement: MOL2-16-347-s012.pdf [file MOL2-16-347-s012.pdf]
